# Supplementary material for: Assessment of responses of North Atlantic winter SST to the NAO in 13 CMIP5 models on the interannual scale
Source: Copernicus journal article supplement (doi:10.5194/os-2020-16), 2020-05-11
Supplement: Supplementary file 1 [file os-2020-16-supplement.pdf]

## Supplement

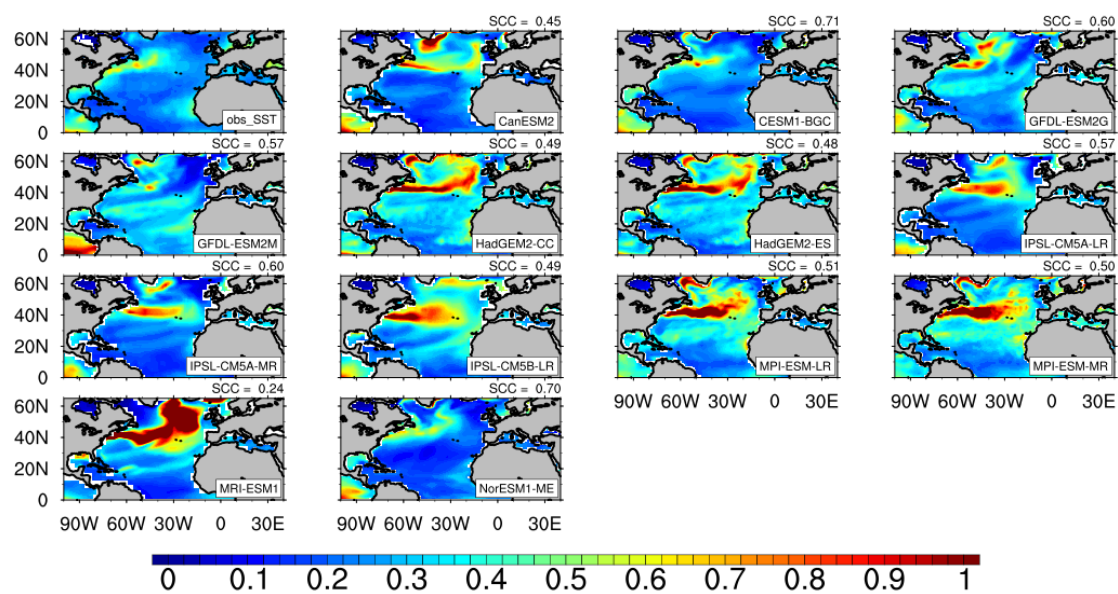

Figure S1 The observed and simulated magnitude of the SST interannual variability (°C, 1SD). The time periods for the observation and models range from 1981 to 2017 and 1969 to 2005, respectively.

(a)

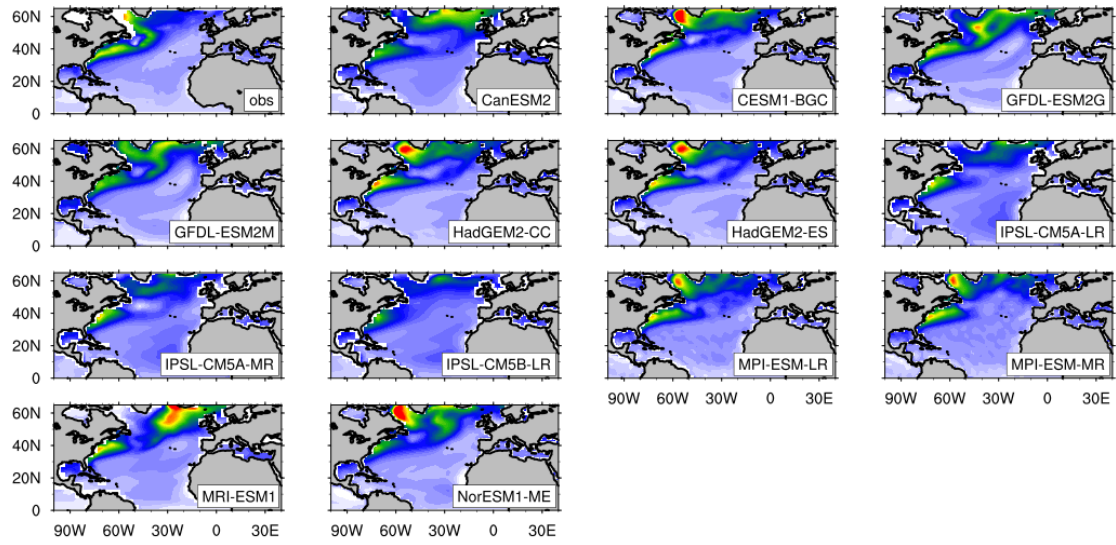

(b)

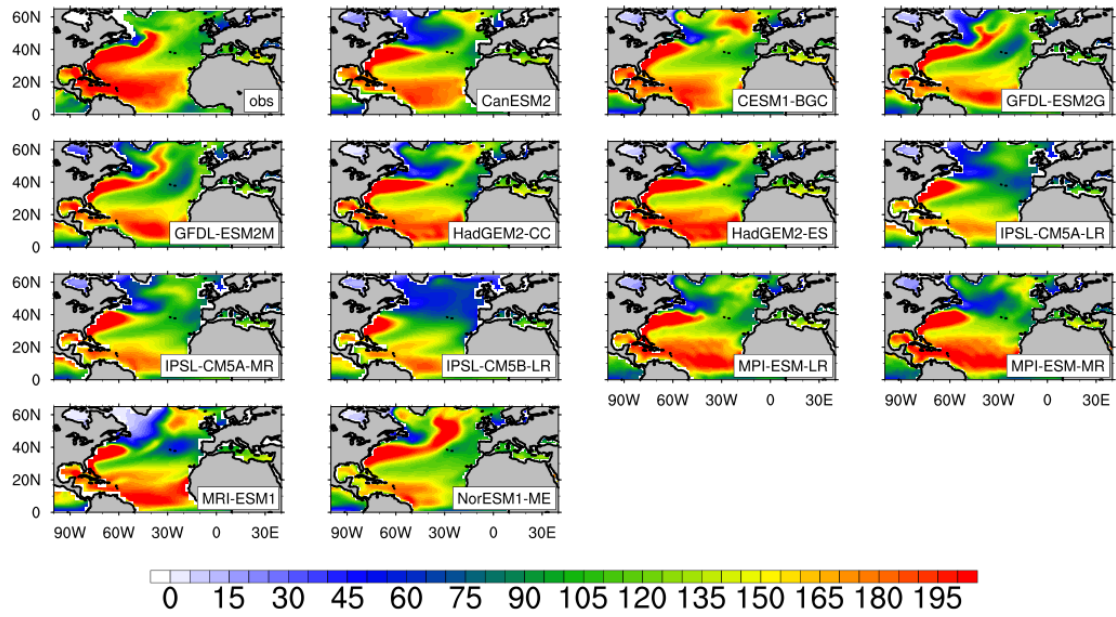

Figure S2 The observed and simulated multi-year mean sensible (a) / latent heat flux (b) ( $\text{W/m}^2$ ) in winter. The time periods for the observation and models range from 1902 to 2010 and 1897 to 2005, respectively.
